# Supplementary material for: Early bile drainage improves native liver survival in biliary atresia without cholangitis
Source: PubMed Central journal article supplement (PMC10368976; doi:10.3389/fped.2023.1189792), 2023-07-12
Supplement: Table1.pdf [file Table1.pdf]

Supplementary Table 1. Details for NLS after KPE

|    |                                  | NLS rate after KPE |               |               |               |
|----|----------------------------------|--------------------|---------------|---------------|---------------|
|    |                                  | 6-months           | 1-year        | 2-year        | 5-year        |
| BA | cases (n=145)                    | 67.6%(98/145)      | 51.7%(75/145) | 45.5%(66/145) | 43.4%(63/145) |
| BA | cases without cholangitis (n=63) | 68.3%(43/63)       | 50.8%(32/63)  | 46.0%(29/63)  | 46.0%(29/63)  |

BA, biliary atresia. NLS, native liver survival. KPE, Kasai portoenterostomy.
